# Supplementary material
Source: PubMed Central journal article supplement (PMC3742855)
Supplement: tableS1.pdf [file tableS1.pdf]

Supplemental Table 1. Quantitative real-time PCR primers used in this study.

| <b>Gene</b>                                      | <b>Abbreviation</b>             | <b>Forward primer</b>  | <b>Reverse primer</b>     |
|--------------------------------------------------|---------------------------------|------------------------|---------------------------|
| 18 S rRNA                                        | <i>18 S rRNA</i>                | GCAATTATTCCTCATGAACG   | GGCCTCACTAAACCATCCAA      |
| $\beta$ -Actin                                   | <i><math>\beta</math>-Actin</i> | AGTGTGACGTTGACATCCGTA  | GCCAGAGCAGTAATCTCCTTCT    |
| Peroxisome proliferator-activated receptor alpha | <i>PPAR-<math>\alpha</math></i> | ACAAGGCCTCAGGGTACCA    | GCCGAAAGAAGCCCTTACAG      |
| Fatty acid synthase                              | <i>FAS</i>                      | GCTGCGGAAACTTCAGAAAAT  | AGAGACGTGTCACTCCTGGACTT   |
| Carnitine palmitoyltransferase I A               | <i>CPT1a</i>                    | CACCAACGGGCTCATCTTCTA  | CAAAATGACCTAGCCTTCTATCGAA |
| Diacylglycerol acyltransferase 1                 | <i>DGAT1</i>                    | GTGCCATCGTCTGCAAGATT   | CTGGATAGGATCCACCAGGA      |
| Diacylglycerol acyltransferase 2                 | <i>DGAT2</i>                    | GCGCTACTTCCGAGACTACTT  | GGGCCTTATGCCAGGAAACT      |
| Glycerol-3-phosphate acyltransferase 1           | <i>GPAT1</i>                    | CATCCTCTTTTGCCACAACAT  | ACAGAATGTCTTTGCGTCCA      |
| Glycerol-3-phosphate acyltransferase 2           | <i>GPAT2</i>                    | CTCCTGGTTGCAGAGGAGA    | AGCAGCTTTGCACTCAGATG      |
| Glycerol-3-phosphate acyltransferase 3           | <i>GPAT3</i>                    | GGAGGATGAAGTGACCCAGA   | CCAGTTTTTGAGGCTGCTGT      |
| Glycerol-3-phosphate acyltransferase 4           | <i>GPAT4</i>                    | TGTCTGGTTTGAGCGTTCTG   | TTCTGGGAAGATGAGGATGG      |
| Acylglycerolphosphate acyltransferase 1          | <i>AGPAT1</i>                   | TAAGATGGCCTTCTACAACGGC | CCATACAGGTATTTGACGTGGAG   |
| Acylglycerolphosphate acyltransferase 2          | <i>AGPAT2</i>                   | CAGCCAGGTTCTACGCCAAG   | TGATGCTCATGTTATCCACGGT    |
| Acylglycerolphosphate acyltransferase 3          | <i>AGPAT3</i>                   | CTGCTTGCCTACCTGAAGACC  | GATACGGCGGTATAGGTGCTT     |
| Acylglycerolphosphate acyltransferase 4          | <i>AGPAT4</i>                   | CCAGTTTCTATGTACCTGGTC  | GCAGAGTCTGGCATTGATCTTG    |
| Acylglycerolphosphate acyltransferase 5          | <i>AGPAT5</i>                   | CACACGTACTCTATGCGCTAC  | AAGAAGAGCACCATGTTCTGG     |
| Acylglycerolphosphate acyltransferase 6          | <i>AGPAT6</i>                   | AGCTTGATTGTCAACCTCCTG  | CCGTTGGTGTAGGGCTTGT       |
| Glucose-6-phosphatase                            | <i>G6Pase</i>                   | CGACTCGCTATCTCCAAGTGA  | GTTGAACCAGTCTCCGACCA      |
| Phosphoenolpyruvate carboxykinase                | <i>PEPCK</i>                    | CTGCATAACGGTCTGGACTTC  | CAGCAACTGCCCCGACTCC       |
